# Supplementary material
Source: Springer Nature journal article supplement (http://www.springermedizin.de/resource/supplementary/12943_2013_1141_MOESM7_ESM.pdf/9552590)
Supplement: MOESM7 [file 9552590]

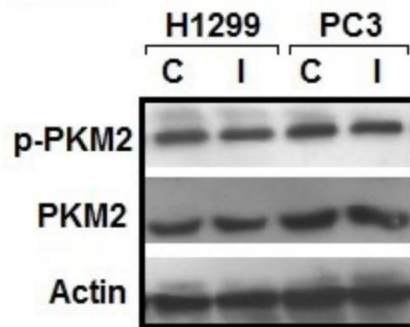

**Fig S7.** Immunoblot showing no change in phosphor-tyr-105-PKM2 upon insulin treatment (100 nM for 15 minutes) in H1299 and PC3 cells.
